# Supplementary material for: Assessing the contribution of active somatosensory stimulation to self-acceleration perception in dynamic driving simulators
Source: PLoS One. 2021 Nov 18;16(11):e0259015. doi: 10.1371/journal.pone.0259015 (PMC8601569; doi:10.1371/journal.pone.0259015)
Supplement: S1 Questionnaire — (XLSX) [file pone.0259015.s003.xlsx]

## Sheet: Foglio1
Participants	Maneuver	Is realism improved by AS?	Did you feel immerse, as in a real car?	Did the AS-system help in distinguishing the different magnitudes?	Sources of information most used	AS as natural addition
P01	0	1	2	1	1 - 2	1
P01	1	1	2	2	1 - 2	1
P02	1	1	2	2	0 - 2	1
P03	1	1	2	0	0 - 1	1
P04	0	1	2	1	2	1
P05	0	1	2	1	1 - 2	0
P06	1	1	0	2	0 - 1 - 3	1
P07	1	1	2	1	1 - 2	1
P08	0	1	2	1	1 - 2	1
P09	0	1	2	1	2	1
P10	1	1	2	0	1	1
	0=Longitudinal	0=No	0= both no	0 = No	0 = Visual M.	0=No
	1=Lateral	1=Yes	1= V_M yes, AS_V_M no	1 = Yes	1 = Platform M.	1=Yes
			2= AS_V_M yes, V_M no	2 = Yes, A bit	2 = AS
			3= both yes		3 = Other (hip angle)
